# Supplementary material
Source: PubMed Central journal article supplement (PMC5710404)
Supplement: jamapediatr-171-863-s001.pdf [file jamapediatr-171-863-s001.pdf]

## Supplementary Online Content

Berg AT, Coryell J, Saneto RP, et al. Early-life epilepsies and the emerging role of genetic testing. *JAMA Pediatr*. Published online July 31, 2017.  
doi:10.1001/jamapediatrics.2017.1743

**eTable.** Pathogenic Variants Reported in the Cohort Including 132 for Which the Findings Were Explanatory of the Child's Condition and 10 for Which the Gene Was Associated With Autosomal Recessive Inheritance and Could Not Alone Explain the Child's Condition

**eFigure.** Sagittal and Axial Images in a Patient With Heterozygous Frameshift Mutation in *RELN* (c.329 dup; p. Gly111Argfs\*7)

This supplementary material has been provided by the authors to give readers additional information about their work.

**eTable.** Pathogenic Variants Reported in the Cohort Including 132 for Which the Findings Were Explanatory of the Child's Condition and 10 for Which the Gene Was Associated With Autosomal Recessive Inheritance and Could Not Alone Explain the Child's Condition

| PATHOGENIC VARIANTS PROVIDING EXPLANATION OF THE CHILD'S CLINICAL CONDITION |                                          |                                       |                            |                 |                                                   |                                |               |
|-----------------------------------------------------------------------------|------------------------------------------|---------------------------------------|----------------------------|-----------------|---------------------------------------------------|--------------------------------|---------------|
| Obs                                                                         | Initial clinical diagnosis               | Specific Initial Finding              | Gene(s) affected           | Type of variant | Coordinates or CDNA                               | Size or Protein change         | Type of error |
| 246                                                                         | Brain malformation or structural anomaly | Agenesis of the corpus callosum       | DRD3, ZNF80, TIGIT, ZBTB20 | CNV             | chr3:113,823,720-115,284,540                      | 1.46Mb                         | deletion      |
| 31                                                                          | Brain malformation or structural anomaly | Agenesis of the corpus callosum       | Multiple                   | CNV             | 2p26.3-2p21                                       | 46 Mb                          | deletion      |
| 523                                                                         | Brain malformation or structural anomaly | Agenesis of the corpus callosum       | Multiple                   | CNV             | chr8:176475-6925888;<br>chr8:176475-6925888       | 6.749Mb loss,<br>28.581Mb gain | complex       |
| 627                                                                         | Brain malformation or structural anomaly | Cerebellar and Callosal abnormalities | Multiple                   | CNV             | chr1:835601-9810107                               | 8.7Mb                          | deletion      |
| 430                                                                         | Brain malformation or structural anomaly | Lissencephaly                         | LIS1                       | CNV             | chr17:1859374-282608                              | 96Kb                           | deletion      |
| 525*                                                                        | Brain malformation or structural anomaly | Lissencephaly                         | LIS1                       | CNV             |                                                   |                                | deletion      |
| 168                                                                         | Brain malformation or structural anomaly | Microcephaly                          | DOCK8, KANK1               | CNV             | chr9:46587-1603814; 16p13.3<br>(88,165-11,065,307 | 1.6Mb; 11Mb                    | complex       |
| 62                                                                          | Brain malformation or structural anomaly | Ventriculomegaly                      | Multiple                   | CNV             | chr11:79,448,655-114,375,717                      | 34.93 Mb                       | deletion      |
| 578                                                                         | Dysmorphic Syndrome                      | Clinically Dysmorphic                 | Multiple                   | CNV             | 13q11q14.2.                                       | 28.21Mb                        | gain          |
| 722*                                                                        | Dysmorphic Syndrome                      | Clinically Dysmorphic                 | Multiple                   | CNV             | 5q deletion                                       |                                | deletion      |
| 490                                                                         | Dysmorphic Syndrome                      | Clinically Dysmorphic                 | Multiple                   | CNV             | 11q14.3-q25                                       | 43.3Mb                         | gain          |
| 391                                                                         | Dysmorphic Syndrome                      | DeGeorge Syndrome                     | Multiple                   | CNV             | chr2:165,684,853-166,668,958                      | not reported                   | gain          |
| 230                                                                         | Dysmorphic Syndrome                      | Noonan Syndrome                       | SHOC2, SMC3, CNNM3         | CNV             | chr10:104491930-115884864                         | 11.4Mb                         | deletion      |
| 293                                                                         | Dysmorphic Syndrome                      | Williams Syndrome                     | Multiple                   | CNV             | chr7:72700127-74141603                            | 1.44Mb                         | deletion      |

| Obs   | Initial clinical diagnosis | Specific Initial Finding                | Gene(s) affected           | Type of variant | Coordinates or CDNA                         | Size or Protein change | Type of error |
|-------|----------------------------|-----------------------------------------|----------------------------|-----------------|---------------------------------------------|------------------------|---------------|
| 558   | Dysmorphic Syndrome        | Williams Syndrome                       | Multitple                  | CNV             | chr7:72,722,981-74,200,092                  | 1.48Mb                 | deletion      |
| 462   | Dysmorphic Syndrome        | Wolf-Hirschhorn                         | FGFR3, LETM1, WHSC1, WHSC2 | CNV             | chr4:71420-2343851                          | 2.3Mb                  | deletion      |
| 717*  | Dysmorphic Syndrome        | Wolf-Hirschhorn                         | Multitple                  | CNV             | 46, XX del(4)(p16)                          |                        | deletion      |
| 504   | Dysmorphic Syndrome        | Wolf-Hirschorn                          | Multitple                  | CNV             | ring Chromosome 4,46, XX, r(4)(p.16.3q35.2) | Ring Chr 4             | deletion      |
| 570   | Dysmorphic Syndrome        | Wolf-Hirschorn                          | Multitple                  | CNV             | chr4:49,450-11,487,322                      | 11.44Mb                | deletion      |
| 663   | Dysmorphic Syndrome        | Wolf-Hirschorn                          | Multitple                  | CNV             | chr4:68345-12922536                         | 12.9Mb                 | deletion      |
| 509   | Unknown                    | Development normal/mild-equivocal delay | Multiple                   | CNV             | chr16:21839340-22435811                     | 596 kb                 | deletion      |
| 464** | Unknown                    | Development normal/mild-equivocal delay | Multiple                   | CNV             | 1p36.12p36.11 chr1:752,566-22,333,595;x4    | 4.2Mb                  | gain          |
| 491   | Unknown                    | Developmental delay                     | CDKL5                      | CNV             | chrX:18460280-18573966                      | 114Kb                  | loss          |
| 135   | Unknown                    | Developmental delay                     | Multitple                  | CNV             | chr1:849466-2330338                         | 2.3 Mb                 | loss          |
| 225   | Unknown                    | Developmental delay                     | Multitple                  | CNV             | chr1:849466-3324209                         | 2.48Mb                 | loss          |
| 394   | Unknown                    | Developmental delay                     | Multitple                  | CNV             | chr4: 4q21.1-q21.3                          | 10.4Mb                 | loss          |
| 703   | Unknown                    | Developmental delay                     | Multitple                  | CNV             | 1p36.33p36.23 deletion (from 0-7970027)     | 8Mb                    | loss          |
| 98    | Unknown                    | Developmental delay                     | multiple                   | CNV             | chr16 29678569-30363689                     | 16p11.2 0.519 Mb loss  | loss          |
| 482   | Unknown                    | Developmental delay                     | NDE1, MYH11, ABCC6, XYLT1  | CNV             | chr16:15493046-18164698                     | 2.7Mb                  | loss          |
| 14    | Unknown                    | Developmental delay                     | PRRT2                      | CNV             | chr16:29378488-30199186                     | 771Kb                  | loss          |
| 476   | Unknown                    | Developmental delay                     | UBE3A,SNRPN, OCA2          | CNV             | chr15:20161372-28544359                     | 8.4Mb                  | insertion     |
| 381   | Dysmorphic Syndrome        | DiGeorge syndrome                       | Multitple                  | Del             | chr21:18,919,528-21,460,595                 | 2.54Mb                 | loss          |
| 319   | Neurocutaneous             | Tuberous Sclerosis Complex              | TSC2                       | Del             | deletion of exon 33                         |                        | deletion      |

| Obs  | Initial clinical diagnosis               | Specific Initial Finding                | Gene(s) affected | Type of variant | Coordinates or CDNA       | Size or Protein change      | Type of error |
|------|------------------------------------------|-----------------------------------------|------------------|-----------------|---------------------------|-----------------------------|---------------|
| 592  | Neurocutaneous                           | Tuberous Sclerosis Complex              | TSC2             | Del             | chr16:2098079-2121566     | 23.5Kb                      | loss          |
| 566  | Other                                    | Atrophy/pseudo atrophy                  | STXBP1           | Del             | deletion exon 4 +         |                             | deletion      |
| 644  | Unknown                                  | Development normal/mild-equivocal delay | SCN1A            | Del             | deletions exons 14-15     |                             | deletion      |
| 20   | Unknown                                  | Developmental delay                     | KCNQ2            | Del             | deletions exons 11-13     |                             | deletion      |
| 548  | Unknown                                  | Development normal/mild-equivocal delay | UBE3A            | Dup             | chr15:20848460-27662530X4 |                             | duplication   |
| 68   | Brain malformation of structural anomaly | Agenesis of the corpus callosum         | SETBP1           | SNV             | c.2608G>A                 | p.Gly870Ser                 | missense      |
| 414* | Brain malformation of structural anomaly | Cerebellar hypoplasia                   | CASK             | SNV             |                           |                             |               |
| 173  | Brain malformation of structural anomaly | Holoprosencephaly                       | TGIF1            | MNV             | c.340_349dupGGGGCCAAGA    | p.Ile117Argfs*6             | frameshift    |
| 183  | Brain malformation of structural anomaly | Microcephaly                            | ASPM(MCPH5)      | MNV             | c.8711_8712delAA          | p.Arg1405Cys                | frameshift    |
| 189  | Brain malformation of structural anomaly | Microcephaly                            | ATP1A3           | SNV             | c.2771T>C                 | p.Leu924Pro                 | missense      |
| 55*  | Brain malformation of structural anomaly | Microcephaly                            | BRAT1            | SNV             | c.171delG; c.419T>C       | p.Glu57Aspfs*7; p,Leu140Pro | missense      |
| 155  | Brain malformation of structural anomaly | Microcephaly                            | FOXP1            | SNV             | c.1402_1405delTCTG        | p.Ser468GlyfsX19            | missense      |
| 498  | Brain malformation of structural anomaly | Microcephaly                            | HNRNPR           | SNV             | c.1663C>T                 | p.Gln555X                   | nonsense      |
| 586  | Brain malformation of structural anomaly | Walker-Warburg Syndrome                 | FKTN             | SNV             | c.642dupT                 | p.Asp215X                   | nonsense      |

| Obs  | Initial clinical diagnosis               | Specific Initial Finding         | Gene(s) affected | Type of variant | Coordinates or CDNA        | Size or Protein change         | Type of error       |
|------|------------------------------------------|----------------------------------|------------------|-----------------|----------------------------|--------------------------------|---------------------|
| 770  | Brain malformation of structural anomaly | Walker-Warburg Syndrome          | POMT2            | SNV             | c.1872C>T; c.1006+1G>A     | p.Thr588X; IVS8+1G>A           | nonsense&frameshift |
| 308  | Brain malformation of structural anomaly | Heterotopia (Band)               | DCX              | SNV             | c.574C>T                   | p.Arg192Trp                    | missense            |
| 10   | Brain malformation of structural anomaly | Lissencephaly w/band heterotopia | DCX              | SNV             | c.176G>A                   | p.Arg59His                     | missense            |
| 647  | Dysmorphic Syndrome                      | Cornelia de Lange                | SMIC1A           | MNV             | c.1636_1638delATT          | p.Ile546del                    | inframe deletion    |
| 40   | Metabolic                                | Alper-Huttenlocher Disease       | POLG1            | SNV             | c.3286C>T;c.2800-2801delAA | p.Arg1096Cys; p.Lys934AspfsX10 | missense            |
| 673  | Metabolic                                | GM1 gangliosidosis               | GLB1             | SNV             | c.176G>A                   | p.Arg59His                     | frameshift          |
| 337  | Metabolic                                | Leigh syndrome                   | mtATP6           | SNV             | c.8993T>G                  | p.Leu156Arg                    | missense            |
| 71   | Metabolic                                | Leigh syndrome                   | mtND5            | SNV             | G:27.1, a:72.6             | p.Asp393Asn                    | missense            |
| 495  | Metabolic                                | Leigh syndrome                   | ATP6             | SNV             | c.8993T>G                  | p.Leu156Arg                    | missense            |
| 554  | Metabolic                                | Mitochondrial disease            | FBXL4            | SNV             | c.64C>T; c.1444C>T         | p.Arg22; p.Arg482Trp           | nonsense            |
| 279  | Metabolic                                | Nonketotic hyperglycinemia       | GLDC             | SNV             | c.1009C>T (HZ)             | p.Arg337X                      | missense            |
| 611  | Metabolic                                | Nonketotic hyperglycinemia       | GLDC             | SNV             | c.1054delA                 | p.Thr352Glnfs*65               | frameshift          |
| 757  | Metabolic                                | Nonketotic hyperglycinemia       | GLDC             | SNV             | c.499G>T; c.2714T>G        | p.Glu167Stop; p.Val905Gly      | stop&?              |
| 576  | Metabolic                                | Pyruvate dehydrogenas deficiency | PDHA1            | SNV             | c.707C>A                   | p.Ala236Glu                    | missense            |
| 197  | Metabolic                                | Zellweger's syndrome             | HSD17B4          | SNV             | c.868+1delG (HZ)           | Exon 11 splice donor site      | splice site         |
| 543  | Neurocutaneous                           | epidermal-nevus + CC abnormality | KRAS             | SNV             | c.35G>T                    | p.Thr68Asn(T68N)               | missense            |
| 309  | Neurocutaneous                           | Linear sebaceous nevus syndrome  | KRAS             | SNV             | c.35G>A                    | p.Gly12Asp                     | missense            |
| 144  | Neurocutaneous                           | Neurofibromatosis                | NF1              | SNV             | c.3132C>G                  | p.Tyr1044X                     | nonsense            |
| 527* | Neurocutaneous                           | Neurofibromatosis                | NF1              | SNV             | c.4537C>T                  | p.Arg1513*                     | nonsense            |
| 311  | Neurocutaneous                           | Tuberous Sclerosis Complex       | TSC1             | SNV             | c.1797dupG                 |                                | frameshift          |
| 502  | Neurocutaneous                           | Tuberous Sclerosis Complex       | TSC1             | SNV             | c.2272C>T                  | p.Gln758X                      | nonsense            |

| Obs   | Initial clinical diagnosis | Specific Initial Finding                | Gene(s) affected | Type of variant | Coordinates or CDNA  | Size or Protein change | Type of error          |
|-------|----------------------------|-----------------------------------------|------------------|-----------------|----------------------|------------------------|------------------------|
| 200   | Neurocutaneous             | Tuberous Sclerosis Complex              | TSC2             | SNV             | c.1361G>A            | p.Arg454Lys            | missense               |
| 209   | Neurocutaneous             | Tuberous Sclerosis Complex              | TSC2             | SNV             | c.1255C>T            | p.Pro419Ser            | missense               |
| 706*  | Neurocutaneous             | Tuberous Sclerosis Complex              | TSC2             | SNV             | c.1604delG           |                        | frameshift             |
| 733   | Neurocutaneous             | Tuberous Sclerosis Complex              | TSC2             | SNV             | c.1832G>A            | p.Arg611Gln            | missense               |
| 750   | Neurocutaneous             | Tuberous Sclerosis Complex              | TSC2             | SNV             | c.5479T>C            | p.Phe1527Leu           | missense               |
| 181   | Other                      | Dystroglycanopathy                      | TRAPPC11         | SNV             | c.851A>C; c.965+5G>T | p.Gln248Pro            | frameshift&splice site |
| 24*   | Other                      | Tumor(?)                                | MECP2            | SNV             | c.316C>T             | p.Arg106Trp            | missense               |
| 163*  | Unknown                    | Development normal/mild-equivocal delay | GABRG2           | SNV             |                      |                        |                        |
| 233   | Unknown                    | Development normal/mild-equivocal delay | GABRG2           | SNV             | c.731G>A             | p.Gly244Asp            | missense               |
| 194   | Unknown                    | Development normal/mild-equivocal delay | PRRT2            | SNV             | c.649dupC            | p.Arg217ProfsX8        | frameshift             |
| 257   | Unknown                    | Development normal/mild-equivocal delay | PRRT2            | SNV             | c.215_216delCA       | p.Thr72ArgfsX61        | frameshift             |
| 112   | Unknown                    | Development normal/mild-equivocal delay | SCN1A            | SNV             | c.141delT            | p.Asn47LysfsX45        | missense               |
| 143   | Unknown                    | Development normal/mild-equivocal delay | SCN1A            | SNV             | c.2966C>T            | p.Ala989Val            | missense               |
| 153   | Unknown                    | Development normal/mild-equivocal delay | SCN1A            | SNV             | c.5434T>A            | p.Trp1812Arg           | missense               |
| 175** | Unknown                    | Development normal/mild-equivocal delay | SCN1A            | SNV             | c.5273-5277delA      | p.Asn1758lfsx          | frameshift             |
| 196   | Unknown                    | Development normal/mild-equivocal delay | SCN1A            | SNV             | c.1570G>T            | p.Glu524X              | nonsense               |

| Obs  | Initial clinical diagnosis | Specific Initial Finding                | Gene(s) affected | Type of variant | Coordinates or CDNA   | Size or Protein change | Type of error |
|------|----------------------------|-----------------------------------------|------------------|-----------------|-----------------------|------------------------|---------------|
| 450  | Unknown                    | Development normal/mild-equivocal delay | SCN1A            | SNV             | 182T>C                | p.Leu61Pro             | missense      |
| 529  | Unknown                    | Development normal/mild-equivocal delay | SCN1A            | SNV             | c.476delA             | p.Tyr159SerfsX13       | frameshift    |
| 747  | Unknown                    | Development normal/mild-equivocal delay | SCN1A            | SNV             | c.2585G>C             | p.Arg862Pro            | missense      |
| 758  | Unknown                    | Development normal/mild-equivocal delay | SCN1A            | SNV             | c.3146_3152dup        | p.Asp1052Thrfs*3       | frameshift    |
| 766  | Unknown                    | Development normal/mild-equivocal delay | SCN1A            | SNV             | c.739C>G              | p.Leu247Val            | missense      |
| 69   | Unknown                    | Development normal/mild-equivocal delay | SLC2A1           | SNV             | c.847C>T              | p.Gln283*              | nonsense      |
| 428  | Unknown                    | Development normal/mild-equivocal delay | STXBP1           | SNV             | c.364C>T              | p.Arg122X              | missense      |
| 760  | Unknown                    | Developmental delay                     | ALG13            | SNV             | c.320A>G              | p.Asn107Ser            | missense      |
| 76   | Unknown                    | Developmental delay                     | ARX              | SNV             | c.1593_1599dupCATAGCC | p.Ala534HisfsX141      | frameshift    |
| 418* | Unknown                    | Developmental delay                     | ARX              | SNV             |                       |                        |               |
| 550  | Unknown                    | Developmental delay                     | CDKL5            | SNV             | c.145+2T>C            | p.IVS4+2T>C            | splice site   |
| 771  | Unknown                    | Developmental delay                     | CDKL5            | SNV             | c.1763delC            | p.Pro588Leufs*28       | frameshift    |
| 773  | Unknown                    | Developmental delay                     | CDKL5            | SNV             | c.611T>A              | p.Leu204His            | missense      |
| 19*  | Unknown                    | Developmental delay                     | GRIN2A           | SNV             | c.1930.A>G            | p.Ser644Gly            | missense      |
| 263  | Unknown                    | Developmental delay                     | KANSL1           | SNV             | c.2203+1G>A           | IVS6-1G>A              | splice site   |
| 531  | Unknown                    | Developmental delay                     | KCNQ2            | SNV             | c.841G>T              | p.Glu281Trp            | missense      |
| 467  | Unknown                    | Developmental delay                     | MECP2            | SNV             | c.808C>T              | p.Arg270X              | missense      |

| Obs   | Initial clinical diagnosis | Specific Initial Finding      | Gene(s) affected | Type of variant     | Coordinates or CDNA    | Size or Protein change             | Obs         |
|-------|----------------------------|-------------------------------|------------------|---------------------|------------------------|------------------------------------|-------------|
| 386   | Unknown                    | Developmental delay           | PHF8             | SNV                 | c.1731-2A>G            | splice site                        | splice site |
| 250   | Unknown                    | Developmental delay           | PIGN             | SNV                 | c.2340T>A; c.1434+5G>A | p.Tyr780X;<br>intron17 splice site | frameshift  |
| 191   | Unknown                    | Developmental delay           | PRRT2            | SNV                 | c.649dupC              | p.Arg217ProfsX8                    | frameshift  |
| 216   | Unknown                    | Developmental delay           | SCN1A            | SNV                 | c.4486C>T              | p.Gln1495X                         | missense    |
| 195   | Unknown                    | Developmental delay           | ST3GAL5          | SNV                 | c.353delA              | p.Lys118Argfs*70                   | frameshift  |
| 7*    | Unknown                    | Developmental delay           | STXBP1           | SNV                 | c.703C>T               | p.Arg235X                          | nonsense    |
| 92**  | Unknown                    | Developmental delay           | STXBP1           | SNV                 | c.416C>T               | p.Pro139Leu                        | missense    |
| 226   | Dysmorphic Syndrome        | Pallister Killian             | Tetrasomy        | Tertrasomy          |                        |                                    |             |
| 288** | Unknown                    | Developmental delay           | Idic 15          | Tetrasomy (partial) |                        |                                    |             |
| 426   | Dysmorphic Syndrome        | Partial trisomy chromosome 15 | TRI15            | Trisomy             |                        |                                    |             |
| 466   | Dysmorphic Syndrome        | Trisomy 13                    | TRI13            | Trisomy             |                        |                                    |             |
| 762   | Dysmorphic Syndrome        | Trisomy 15 mosaic+Ring Chr21  | TRI15            | Trisomy             |                        |                                    |             |
| 125   | Dysmorphic Syndrome        | Trisomy 18                    | TRI18            | Trisomy             |                        |                                    |             |
| 45    | Dysmorphic Syndrome        | Trisomy 21                    | TRI21            | Trisomy             |                        |                                    |             |
| 57    | Dysmorphic Syndrome        | Trisomy 21                    | TRI21            | Trisomy             |                        |                                    |             |
| 67    | Dysmorphic Syndrome        | Trisomy 21                    | TRI21            | Trisomy             |                        |                                    |             |
| 90    | Dysmorphic Syndrome        | Trisomy 21                    | TRI21            | Trisomy             |                        |                                    |             |
| 159   | Dysmorphic Syndrome        | Trisomy 21                    | TRI21            | Trisomy             |                        |                                    |             |
| 262   | Dysmorphic Syndrome        | Trisomy 21                    | TRI21            | Trisomy             |                        |                                    |             |
| 277   | Dysmorphic Syndrome        | Trisomy 21                    | TRI21            | Trisomy             |                        |                                    |             |



| Obs | Initial clinical diagnosis | Specific Initial Finding | Gene(s) affected | Type of variant | Coordinates or CDNA | Size or Protein change | Obs |
|-----|----------------------------|--------------------------|------------------|-----------------|---------------------|------------------------|-----|
| 305 | Dysmorphic Syndrome        | Trisomy 21               | TRI21            | Trisomy         |                     |                        |     |
| 327 | Dysmorphic Syndrome        | Trisomy 21               | TRI21            | Trisomy         |                     |                        |     |
| 336 | Dysmorphic Syndrome        | Trisomy 21               | TRI21            | Trisomy         |                     |                        |     |
| 354 | Dysmorphic Syndrome        | Trisomy 21               | TRI21            | Trisomy         |                     |                        |     |
| 537 | Dysmorphic Syndrome        | Trisomy 21               | TRI21            | Trisomy         |                     |                        |     |
| 599 | Dysmorphic Syndrome        | Trisomy 21               | TRI21            | Trisomy         |                     |                        |     |
| 660 | Dysmorphic Syndrome        | Trisomy 21               | TRI21            | Trisomy         |                     |                        |     |
| 678 | Dysmorphic Syndrome        | Trisomy 21               | TRI21            | Trisomy         |                     |                        |     |
| 700 | Dysmorphic Syndrome        | Trisomy 21               | TRI21            | Trisomy         |                     |                        |     |
| 767 | Dysmorphic Syndrome        | Trisomy 21               | TRI21            | Trisomy         |                     |                        |     |

**HETEROZYGOUS PATHOGENIC MUTATIONS FOR AUTOSOMAL RECESSIVE DISORDERS. THESE WERE NOT CONSIDERED FULLY EXPLANATORY OF THE CHILD'S CONDITION**

| Obs       | Initial clinical diagnosis               | Specific Initial Finding                | Gene(s) affected | Type of variant | Coordinates or CDNA | Size or Protein change | Type of error |
|-----------|------------------------------------------|-----------------------------------------|------------------|-----------------|---------------------|------------------------|---------------|
| 47*       | Unknown                                  | Development normal/mild-equivocal delay | ALDH7A1          | SNV             |                     |                        |               |
| 127       | Unknown                                  | Development normal/mild-equivocal delay | ALDH7A1          | SNV             | c.1279G>C           | p.Glu427Gln            | missense      |
| 218       | Unknown                                  | Developmental delay                     | ALG3             | SNV             | c.487C>T            | p.Arg163Cys            | missense      |
| 220       | Brain malformation of structural anomaly | microcephaly                            | C5orf52          | SNV             | c.8300-1G>C         |                        | splice site   |
| 342*, *** | Metabolic                                | Leigh syndrome                          | NDUFAF5          | SNV             |                     |                        |               |
| 557       | Unknown                                  | Developmental delay                     | FUCA1            | SNV             | c.1082G>A           | p.W361*                | nonsense      |
| 616       | Brain Malformation                       | Lissencephaly                           | SAMHD1           | MNV             | c.155_158insGCTC    | p.Ser52fs              | frameshift    |

| Obs    | Initial clinical diagnosis               | Specific Initial Finding                | Gene(s) affected | Type of variant | Coordinates or CDNA | Size or Protein change | Type of error |
|--------|------------------------------------------|-----------------------------------------|------------------|-----------------|---------------------|------------------------|---------------|
| 727    | Unknown                                  | Development normal/mild-equivocal delay | POLG1            | SNV             | c.803G>C            | p.Gly268Ala            | missense      |
| 728    | Other                                    | infarct/stroke VS metabolic             | SCO2             | SNV             | c.283C>T            | p.Arg95Cys             | missense      |
| 751*** | Brain malformation of structural anomaly | Lissencephaly                           | RELN             | SNV             | c.329dup            | p.Gly111Argfs*7        | frameshift    |

The actual laboratory report was not available and only partial information was available in the medical record.

\*\*Original interpretation by the clinical lab of Variant of Unknown Significance was reinterpreted as Pathogenic.

\*\*\*The child's clinical condition was strongly associated with the gene.

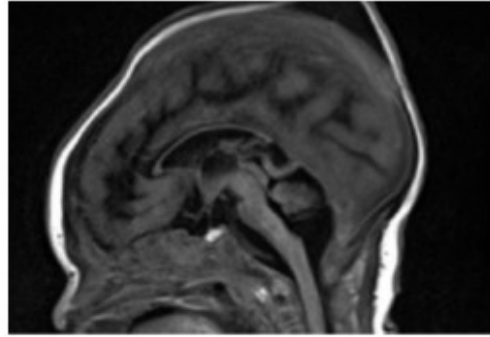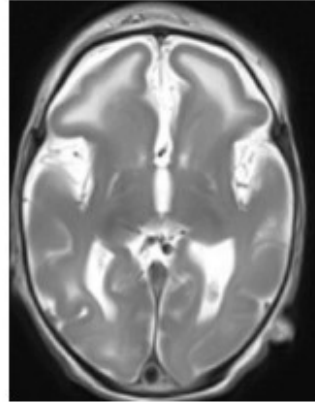

eFigure 1. Sagittal and axial images in a patient with heterozygous frameshift mutation in *RELN* (c.329 dup; p. Gly111Argfs\*7).
